# Supplementary material
Source: PubMed Central journal article supplement (PMC4248818)
Supplement: JB.01908-14_zjb999093363so1.pdf [file JB.01908-14_zjb999093363so1.pdf]

1 **SUPPLEMENTARY MATERIALS**

2 **Table S1.** Primers used in this study.

| <b>Gene</b>                    | <b>Locus Tag</b> | <b>Forward Primer (5'→3')</b> | <b>Reverse Primer Sequence (5'→3')</b> |
|--------------------------------|------------------|-------------------------------|----------------------------------------|
| <b><u>Complementation:</u></b> |                  |                               |                                        |
| <i>aprE</i> and <i>tolC</i>    | SCBI_3625        | CAGGCCATTACGTTCTTAAAC         | CTTGGGTGGCTTCTCGTTAT                   |
| <i>gidA</i>                    | SCBI_4598        | CACCGATCATTACAGCAAAC          | GCGAGCAGCGAGTCTTAAT                    |
| MCP II                         | SCBI_0077        | GTGTGGGAACACGCTTACTA          | GCACTGATTTGGTGGCTTAAA                  |
| PIN protein                    | SCBI_0044        | GTCAAGCAGTCTCTCGCTATC         | CTGTCTTACGCCACCGTATATC                 |
| <b><u>qRT-PCR:</u></b>         |                  |                               |                                        |
| <i>l21p</i>                    | SCBI_0382        | GGTGGTAAACAACACCGAGTAA        | CGCCATTAGCGATCATCAGAA                  |
| <i>prtA1</i>                   | SCBI_0187        | CTGTAGACGACCTGTTGCATTA        | GGTTTGGTTCTCACGGGTAATA                 |
| <i>prtA2</i>                   | SCBI_1952        | CCACAGCCTGATGAGCTATTT         | GGATCGCCGTGATGTCATT                    |
| <i>prtA3</i>                   | SCBI_2172        | TCCGCGATAACTTCAGCTTA          | TTTGCCTCAGGAAGGAATAGG                  |
| <i>prtA4</i>                   | SCBI_3084        | CCTCGTATGAAAGTACGCAGAG        | CCTCGTATGAAAGTACGCAGAG                 |
| Serine protease 1              | SCBI_4441        | GTGTCGGACTACGGCAATAA          | TTCAGCAAGTCGGCAATCT                    |
| Serine protease 2              | SCBI_4442        | AGCATCAGCACCTTCTCTTC          | CCTTCAATCACCGAGCTGTAT                  |
| <i>yfgC</i>                    | SCBI_3465        | TGCAGTCTTCGCAGGATTAC          | CAGCTCTTCATTCAGGCCATA                  |
| Metalloprotease                | SCBI_3545        | GACGAGGCCTACGACTATCT          | AGCGGCAGCCCTTTATTATC                   |
| ImpD                           | SCBI_2996        | GTTTCGCATGGTGAGCAATAAG        | CTGACCCTGGCCTGATTTAC                   |
| CcmC                           | SCBI_3334        | CTCGGCTATCTGCTGTTGTT          | TCATGACTGACGCTCCTTATTC                 |
| Bleomycin resist.              | SCBI_1742        | TGCCGGATGAGAACGAATG           | GGTAGCCATCAGGATCTTCAA                  |
| FliZ                           | SCBI_2727        | GTTCGAACAGACCGAGATGAG         | AAACTTGTCTGCCGGGTAAT                   |

**Table S2.** Protease genes analyzed by qRT-PCR

| <b>Gene</b>       | <b>Locus Tag</b> | <b>Gene Size (bp)</b> | <b>Species Containing Homologues<sup>†</sup></b>                                                                                                                           |
|-------------------|------------------|-----------------------|----------------------------------------------------------------------------------------------------------------------------------------------------------------------------|
| <i>prtA1</i>      | SCBI_0187        | 1,515                 | <i>Serratia</i> spp.                                                                                                                                                       |
| <i>prtA2</i>      | SCBI_1952        | 1,419                 | <i>S. marcescens</i> , <i>Photorhabdus</i> spp., <i>Xenorhabdus nematophila</i>                                                                                            |
| <i>prtA3</i>      | SCBI_2172        | 1,617                 | <i>Serratia</i> spp., <i>Dickeya</i> spp., <i>Erwinia</i> spp.                                                                                                             |
| <i>prtA4</i>      | SCBI_3084        | 1,383                 | <i>Serratia</i> spp., <i>Dickeya</i> spp.                                                                                                                                  |
| Serine protease 1 | SCBI_4441        | 3,093                 | <i>Serratia</i> spp., <i>Cronobacter</i> spp., <i>Xenorhabdus</i> spp., <i>Pseudomonas</i> spp.                                                                            |
| Serine protease 2 | SCBI_4442        | 3,024                 | <i>Serratia</i> spp., <i>Cronobacter</i> spp., <i>Xenorhabdus</i> spp., <i>Pseudomonas</i> spp.                                                                            |
| <i>yfgC</i>       | SCBI_3465        | 1,470                 | <i>Serratia</i> spp., <i>Yersinia</i> spp., <i>Rahnella</i> spp., <i>Erwinia</i> spp., <i>Edwardsiella</i> spp., <i>Citrobacter</i> spp., <i>Salmonella enterica</i>       |
| Metalloprotease   | SCBI_3545        | 1,026                 | <i>Serratia</i> spp., <i>Rahnella</i> spp., <i>Enterobacter</i> spp., <i>Cronobacter</i> spp., <i>Pantoea</i> spp., <i>Salmonella enterica</i> , <i>Klebsiella oxytoca</i> |

<sup>†</sup>As determined by BlastX, cutoff  $\geq 50\%$  identity.

**Table S3.** List of all genes significantly up-regulated  $\geq 1.5$ -fold (p-value  $< 0.05$ ) in mutant 16-D2 compared to wild-type *Serratia* sp. SCBI as determined with RNA-seq.

| <b>Locus Tag</b>                           | <b>Gene</b>                                                            | <b>Fold Change</b> |
|--------------------------------------------|------------------------------------------------------------------------|--------------------|
| <i>Defense Mechanisms</i>                  |                                                                        |                    |
| SCBI_2967                                  | ABC-type bacteriocin/antibiotic exporter                               | 4.04               |
| <i>Intracellular Trafficking/Secretion</i> |                                                                        |                    |
| SCBI_4445                                  | P pilus assembly/Cpx signaling pathway                                 | 1.78               |
| SCBI_0966                                  | Type II secretory pathway, PulC component                              | 5.86               |
| <i>Signal Transduction</i>                 |                                                                        |                    |
| SCBI_2980                                  | Response regulator - CheY-like receiver domain, HTH DNA-binding domain | 14.69              |
| SCBI_2906                                  | Colanic acid capsular biosynthesis activation protein A                | 1.54               |
| <i>Function Unknown</i>                    |                                                                        |                    |
| SCBI_0066                                  | Fic family protein                                                     | 3.51*              |
| SCBI_2995                                  | Hypothetical                                                           | 18.38              |
| SCBI_2986                                  | Hypothetical                                                           | 12.06              |
| SCBI_2996                                  | Hemolysin-coregulated hypothetical protein                             | 10.37              |
| SCBI_2997                                  | Hypothetical                                                           | 10.17              |
| SCBI_1234                                  | 3-Demethylubiquinone-9-3-methyltransferase                             | 9.56               |
| SCBI_2994                                  | Type VI secretion protein                                              | 9.26               |
| SCBI_2998                                  | Hypothetical                                                           | 8.73               |
| SCBI_1189                                  | Hypothetical                                                           | 7.97               |
| SCBI_1197                                  | Hypothetical                                                           | 7.87               |
| SCBI_2990                                  | Hypothetical                                                           | 7.29               |
| SCBI_4194                                  | Hypothetical                                                           | 7.24               |
| SCBI_2985                                  | Hypothetical                                                           | 7.13               |
| SCBI_2999                                  | Hypothetical                                                           | 6.73               |
| SCBI_2620                                  | Hypothetical                                                           | 6.55               |
| SCBI_2984                                  | Type VI secretion protein IcmF                                         | 5.62               |
| SCBI_3391                                  | Hypothetical                                                           | 4.42               |
| SCBI_0518                                  | Hypothetical                                                           | 2.62               |
| SCBI_3622                                  | Hypothetical                                                           | 2.26               |
| SCBI_1730                                  | Acyltransferase                                                        | 2.10               |
| SCBI_4667                                  | GidA - plasmid                                                         | 2.05               |
| <i>General Functional Prediction Only</i>  |                                                                        |                    |
| SCBI_0907                                  | Plasmid maintenance system antidote protein YddM                       | 12.84              |

|           |                                                             |      |
|-----------|-------------------------------------------------------------|------|
| SCBI_2974 | PhoPQ-activated pathogenicity-related protein               | 9.82 |
| SCBI_1391 | Sulfite oxidase                                             | 8.14 |
| SCBI_0049 | Putative homoserine kinase type II                          | 5.38 |
| SCBI_2351 | 6-Phosphogluconolactonase                                   | 5.02 |
| SCBI_1806 | Amidohydrolase                                              | 4.67 |
| SCBI_1310 | Plasmid stabilization protein                               | 4.31 |
| SCBI_2273 | NADPH-quinone reductase, modulator of drug activity         | 4.18 |
| SCBI_2260 | Oxidoreductase                                              | 3.81 |
| SCBI_1734 | Periplasmic lipoprotein                                     | 3.23 |
| SCBI_2048 | Cysteine desufuration protein SufE                          | 3.19 |
| SCBI_0411 | Hydrolase                                                   | 2.78 |
| SCBI_0185 | Plasmid stabilization protein                               | 2.12 |
| SCBI_0044 | Predicted nucleic acid binding protein, contains PIN domain | 1.75 |

*Secondary Metabolite Biosynthesis/Transport/Catabolism*

|           |                                            |       |
|-----------|--------------------------------------------|-------|
| SCBI_1193 | Biotin synthesis protein BioC              | 5.26  |
| SCBI_2930 | Phenylacetic acid degradation protein PaaD | 10.65 |
| SCBI_1177 | Isochorismatase hydrolase                  | 9.12  |
| SCBI_1289 | Isochorismatase hydrolase                  | 3.43  |
| SCBI_3084 | Serralysin - PrtA4 homolog                 | 2.32  |

*Inorganic Ion Metabolism/Transport*

|           |                                                                                                              |       |
|-----------|--------------------------------------------------------------------------------------------------------------|-------|
| SCBI_0727 | Adenylylsulfate kinase                                                                                       | 10.88 |
| SCBI_2034 | Hemin uptake protein                                                                                         | 6.46  |
| SCBI_2406 | Membrane transporters of cations and cationic drugs                                                          | 5.52  |
| SCBI_1127 | Potassium-transporter ATPase protein                                                                         | 5.04  |
| SCBI_1422 | Carbonic anhydrase                                                                                           | 4.97  |
| SCBI_0987 | Periplasmic solute (metal ion) binding protein/adhesin<br>ABC-type phosphate transporter system, ATP-binding | 3.11  |
| SCBI_0015 | protein                                                                                                      | 2.79  |

*Chaperones*

|           |                                    |      |
|-----------|------------------------------------|------|
| SCBI_2993 | Clp ATPase                         | 7.86 |
| SCBI_2044 | Cysteine desufuration protein SufB | 2.10 |

*Cell Motility*

|           |                                          |       |
|-----------|------------------------------------------|-------|
| SCBI_0297 | Pilus assembly protein, porin PapC       | 3.46* |
| SCBI_2973 | P pilus assembly protein, pilin FimA     | 27.94 |
| SCBI_2971 | P pilus assembly protein, porin PapC     | 6.52  |
| SCBI_2970 | P pilus assembly protein, pilin FimA     | 6.00  |
| SCBI_2972 | P pilus assembly protein, chaperone PapD | 5.93  |
| SCBI_1959 | P pilus assembly protein, porin PapC     | 3.32  |
| SCBI_0304 | Fimbrial protein YfcQ                    | 6.49* |

SCBI\_0978 Type VI secretory pathway, prepilin signal peptidase PulO 5.77

*Cell Wall/Membrane/Envelope Biogenesis*

Cell wall-associated hydrolases (invasion-associated  
SCBI\_2365 proteins) 5.88  
SCBI\_2968 Microcin H47 secretion protein 3.88  
SCBI\_0052 Biotin carboxylase 3.33  
SCBI\_2056 Cyclopropane fatty acyl phospholipid synthase 1.97  
Pullulanase-specific type II secretion system outer  
SCBI\_0979 membrane lipoprotein 5.73  
SCBI\_3312 OM lipoprotein 3.59

*Replication/Repair/Recombination*

SCBI\_1954 Hypothetical 8.95  
SCBI\_2367 Oxidative damage repair enzyme NudI 3.79  
SCBI\_0474 Transposase IS3/IS911 family 6.63\*  
SCBI\_2789 DNA polymerase II subunit beta 2.20

*Transcription*

SCBI\_0199 GCN5-like N-acetyltransferase 4.27\*  
SCBI\_1369 Histone acetyltransferase HPA2 5.68  
SCBI\_0214 LysR family transcriptional regulator 3.79\*  
SCBI\_0517 AraC family transcriptional regulator 42.36  
SCBI\_2455 Transcriptional regulator 5.12  
SCBI\_1782 LysR family transcriptional regulator 2.21  
SCBI\_3467 DNA-binding protein 3.20

*Lipid Metabolism/Transport*

SCBI\_0509 3-Oxoacid CoA-transferase subunit B 21.10  
SCBI\_2928 Enoyl-CoA hydratase 3.85  
SCBI\_2736 ACP phosphodiesterase 3.39  
SCBI\_2927 Enoyl-CoA hydratase 2.43

*Coenzyme Metabolism/Transport*

SCBI\_2932 Coenzyme F390 synthetase 2.59  
SCBI\_4021 3,4-dihydroxy-2-butanone 4-phosphate synthase 2.34

*Carbohydrate Metabolism/Transport*

SCBI\_2167 Thermophilic glucose-6-phosphate isomerase 4.76  
Permease of drug/metabolite transporter (DMT)  
SCBI\_1243 superfamily 9.97  
SCBI\_0116 Sugar phosphate permease 3.39\*  
SCBI\_0483 Cryptic 6-phosphobetaglucosidase 3.28\*

|           |                                                                   |       |
|-----------|-------------------------------------------------------------------|-------|
| SCBI_0206 | ABC-type sugar transport system, periplasmic component - glycerol | 2.29* |
|-----------|-------------------------------------------------------------------|-------|

*Amino Acid Metabolism/Transport*

|           |                                                                      |        |
|-----------|----------------------------------------------------------------------|--------|
| SCBI_0017 | ABC transporter substrate-binding protein - amino acid transport     | 2.96*  |
| SCBI_0795 | ABC-type amino acid transport, substrate-binding protein             | 6.26   |
| SCBI_2224 | ABC-type amino acid transport, substrate-binding protein             | 4.00   |
| SCBI_0725 | Sulfate adenylyltransferase subunit 2                                | 12.14  |
| SCBI_0048 | Cys/Met metabolism pyridoxal-phosphate-dependent enzyme              | 11.87* |
| SCBI_0526 | Amino acid transporter system - permease                             | 11.23  |
| SCBI_0801 | Putative threonine efflux protein                                    | 7.61   |
| SCBI_1506 | Putative agmatinase                                                  | 5.42   |
| SCBI_1272 | Threonine efflux protein                                             | 5.08   |
| SCBI_2641 | Glutathione transferase                                              | 4.38   |
| SCBI_0412 | Chorismate mutase                                                    | 3.23   |
| SCBI_1556 | ABC-type spermidine/putrescine transport system, permease component  | 3.12   |
| SCBI_1555 | ABC-type spermidine/putrescine transport system, ATP-binding subunit | 3.08   |
| SCBI_2935 | Amino acid permease                                                  | 2.29   |

*Cell Cycle Control/Mitosis*

|           |                                               |      |
|-----------|-----------------------------------------------|------|
| SCBI_1311 | Antitoxin - prevent host death family protein | 3.97 |
|-----------|-----------------------------------------------|------|

*Entergy Production/Conversion*

|           |                         |      |
|-----------|-------------------------|------|
| SCBI_1662 | Acylphosphatase         | 9.23 |
| SCBI_1951 | Citrate carrier protein | 4.41 |

*No COG Assigned*

|           |                                                     |       |
|-----------|-----------------------------------------------------|-------|
| SCBI_0320 | Entericidin EcnAB                                   | 7.19* |
| SCBI_0478 | Hypothetical                                        | 4.19* |
| SCBI_0306 | Hypothetical                                        | 4.28* |
| SCBI_1912 | Hypothetical                                        | 33.15 |
| SCBI_2979 | Hypothetical                                        | 15.66 |
| SCBI_2983 | Hypothetical                                        | 10.72 |
| SCBI_2334 | Hypothetical                                        | 9.19  |
| SCBI_2988 | Hypothetical                                        | 8.38  |
| SCBI_1742 | Glyoxalase/bleomycin resistance protein/dioxygenase | 8.11  |
| SCBI_2969 | ABC transporter membrane protein                    | 8.08  |
| SCBI_2975 | Hypothetical                                        | 7.64  |
| SCBI_1821 | Hypothetical                                        | 7.47  |

|           |                                                 |      |
|-----------|-------------------------------------------------|------|
| SCBI_2982 | Hypothetical                                    | 7.32 |
| SCBI_2976 | Hypothetical                                    | 7.24 |
| SCBI_2981 | Hypothetical                                    | 7.05 |
| SCBI_1042 | Hypothetical                                    | 6.29 |
| SCBI_0844 | Hypothetical                                    | 5.88 |
| SCBI_0519 | Hypothetical                                    | 5.57 |
| SCBI_0354 | Hypothetical                                    | 5.45 |
| SCBI_2754 | Hypothetical                                    | 4.86 |
| SCBI_0124 | Cellulose biosynthesis operon protein BcsF/YhjT | 4.50 |
| SCBI_0884 | Hypothetical                                    | 4.40 |
| SCBI_2755 | Hypothetical                                    | 3.79 |
| SCBI_1393 | Hypothetical                                    | 3.73 |
| SCBI_2808 | Hypothetical                                    | 3.62 |
| SCBI_3526 | Hypothetical                                    | 3.47 |
| SCBI_3531 | Extracellular serine protease                   | 3.45 |
| SCBI_2790 | Hypothetical                                    | 3.44 |
| SCBI_2753 | Hypothetical                                    | 3.29 |
| SCBI_3642 | Hypothetical                                    | 2.93 |
| SCBI_0047 | Hypothetical                                    | 2.87 |
| SCBI_2286 | Hypothetical                                    | 2.78 |
| SCBI_0365 | Hypothetical                                    | 2.37 |
| SCBI_3798 | Hypothetical                                    | 2.32 |
| SCBI_2305 | Transposase IS3 family                          | 1.76 |

---

\*Original value was infinity.

**Table S4.** List of all genes significantly down-regulated  $\geq -1.5$ -fold (p-value  $<0.05$ ) in mutant 16-D2 compared to wild-type *Serratia* sp. SCBI as determined with RNA-seq.

| <b>Locus Tag</b>                                              | <b>Gene</b>                                                                    | <b>Fold Change</b> |
|---------------------------------------------------------------|--------------------------------------------------------------------------------|--------------------|
| <i>Defense Mechanisms</i>                                     |                                                                                |                    |
| SCBI_2137                                                     | ABC-type multidrug transport system, ATPase protein                            | -11.26             |
| <i>Intracellular Trafficking/Secretion</i>                    |                                                                                |                    |
| SCBI_3748                                                     | Type II secretory pathway PulJ component                                       | -3.87              |
| <i>Function Unknown</i>                                       |                                                                                |                    |
| SCBI_0219                                                     | DedA family protein (membrane)                                                 | -18.61             |
| SCBI_3343                                                     | CsbD family protein                                                            | -9.77              |
| SCBI_3000                                                     | Membrane protein                                                               | -3.88              |
| SCBI_3130                                                     | Hypothetical                                                                   | -1.60              |
| <i>General Function Prediction Only</i>                       |                                                                                |                    |
| SCBI_0440                                                     | NADPH-quinone reductase                                                        | -11.31             |
| SCBI_1229                                                     | Transcriptional regulator ThiJ/PfpI                                            | -10.85             |
| SCBI_0434                                                     | Permease                                                                       | -8.87              |
| SCBI_3231                                                     | 2-succinyl-6-hydroxy-2,4-cyclohexadiene-1-carboxylate synthase                 | -5.06              |
| SCBI_3045                                                     | Permease                                                                       | -4.56              |
| SCBI_4386                                                     | Inositol 2-dehydrogenase                                                       | -3.95              |
| SCBI_0043                                                     | Permease                                                                       | -2.17              |
| <i>Secondary Metabolite Biosynthesis/Transport/Catabolism</i> |                                                                                |                    |
| SCBI_2339                                                     | Isochorimatase hydrolase                                                       | -5.52              |
| <i>Inorganic Ion Metabolism/Transport</i>                     |                                                                                |                    |
| SCBI_4319                                                     | Nitrite reductase ferredoxin subunit                                           | -2.76              |
| SCBI_0700                                                     | ABC-type Fe <sup>3+</sup> -hydroxamate transport system, periplasmic component | -2.99              |
| <i>Chaperones</i>                                             |                                                                                |                    |
| SCBI_3334                                                     | Heme exporter protein CcmC                                                     | -4.68              |
| SCBI_0414                                                     | Peptidase U32                                                                  | -3.79              |
| SCBI_3332                                                     | Cytochrome c-type biogenesis protein CcmE                                      | -3.18              |
| <i>Cell Motility</i>                                          |                                                                                |                    |
| SCBI_4404                                                     | FimA                                                                           | -4.00              |



SCBI\_0160 Periplasmic lipoprotein -2.82

*Cell Wall/Membrane/Envelope Biogenesis*

SCBI\_1720 NodT family RND efflux system OM lipoprotein -3.04

SCBI\_0152 Teichoic acid biosynthesis protein -2.53

SCBI\_1252 D-alanine ligase -2.00

SCBI\_0010 N-acetylglucosamine-1-phosphate uridyltransferase -1.93

*Replication/Repair/Recombination*

SCBI\_0021 Hypothetical -4.18

SCBI\_4070 Hypothetical -5.80

SCBI\_2130 DNA replication terminus site-binding protein -4.23

SCBI\_2586 Holliday junction DNA helicase RuvB -2.45

SCBI\_0574 DNA polymerase III subunit psi -2.26

*Transcription*

SCBI\_1829 Transcriptional activator DcuR -6.23

SCBI\_3059 Response regulator - citrate/malate metabolism -4.44

SCBI\_1277 Histone acetyltransferase HPA2 -4.93

SCBI\_2370 MocR family transcriptional regulator -3.13

SCBI\_0515 AraC-type DNA binding protein -18.37

SCBI\_3185 Transcriptional regulator -11.05

SCBI\_0092 AraC-type DNA binding protein -10.38

SCBI\_1739 Transcriptional regulator ArsR -8.63

SCBI\_2939 LysR family transcriptional regulator -5.36

SCBI\_3459 Transcriptional regulator -3.22

SCBI\_3462 AsnC family transcriptional regulator -3.19

SCBI\_0794 RpiR family transcriptional regulator -3.10

SCBI\_1123 PadR family transcriptional regulator -2.84

*Translation/Ribosomal Structure*

SCBI\_0606 rRNA methylase -2.72

SCBI\_0399 Ribosome-binding factor A -1.80

*Lipid Metabolism/Transport*

SCBI\_0513 3-Hydroxybutyrate dehydrogenase -4.20

SCBI\_3046 2,3-Dihydroxybenzoate 2,3-dehydrogenase -3.26

SCBI\_2459 Membrane-associated phospholipid phosphatase -4.55

*Coenzyme Metabolism/Transport*

SCBI\_3232 2-succinyl-5-enolpyruvyl-6-hydroxy-3- cyclohexene-1-carboxylic-acid synthase -4.30

SCBI\_2136 Dethiobiotin synthetase -2.89

|           |                                          |       |
|-----------|------------------------------------------|-------|
| SCBI_3230 | Dihydroxynaphthoic acid synthase         | -2.76 |
| SCBI_3914 | Ketopantoate hydroxymethyltransferase    | -2.74 |
| SCBI_4524 | 2-Amino-3-ketobutyrate coenzyme A ligase | -1.86 |

*Carbohydrate Metabolism/Transport*

|           |                                                      |       |
|-----------|------------------------------------------------------|-------|
| SCBI_3573 | Putative 3-phenylpropionic acid transporter          | -3.60 |
| SCBI_1386 | Aldolase                                             | -5.72 |
| SCBI_4429 | Ribose/xylose/arabinose ABC transport system, ATPase | -3.85 |
|           | Ribose/xylose/arabinose ABC transport system, inner  |       |
| SCBI_3829 | membrane translocator                                | -3.82 |
| SCBI_1173 | Galactosemutarotase                                  | -3.46 |
| SCBI_4394 | Xylose isomerase                                     | -3.41 |
| SCBI_3264 | Transketolase                                        | -3.16 |
| SCBI_0394 | Phosphoglucosamine mutase                            | -1.85 |
| SCBI_0373 | Fructose 1,6-bisphosphatase                          | -1.67 |
| SCBI_4505 | Triosephosphate isomerase                            | -1.48 |

*Nucleotide Metabolism/Transport*

|           |                                                  |       |
|-----------|--------------------------------------------------|-------|
| SCBI_0452 | Aspartate carbamoyltransferase catalytic subunit | -3.23 |
| SCBI_4136 | Inosine-uridine nucleoside N-ribohydrolase       | -2.45 |
| SCBI_0362 | 2',3'-cyclic-nucleotide 2'-phosphodiesterase     | -2.44 |
| SCBI_0451 | Aspartate carbamoyltransferase                   | -2.11 |
| SCBI_3473 | Phosphoribosylaminoimidazole (AIR) synthetase    | -2.07 |
| SCBI_3474 | Phosphoribosylglycin amide formyltransferase     | -1.89 |
|           | Phosphoribosylaminoimidazole-succinocarboxamide  |       |
| SCBI_3451 | synthase                                         | -1.65 |

*Amino Acid Metabolism/Transport*

|           |                                              |        |
|-----------|----------------------------------------------|--------|
| SCBI_0525 | Peptidase S58 DmpA                           | -9.14  |
| SCBI_4462 | Acetolactate synthase 2 catalytic subunit    | -3.42  |
| SCBI_0630 | Carbamoyl phosphate synthase large subunit   | -1.75  |
| SCBI_0178 | Anaerobic glycerol-3-phosphate dehydrogenase | -17.55 |
| SCBI_2212 | Spermidine synthase-like protein             | -6.13  |
| SCBI_4387 | Acetolactate synthase                        | -4.85  |
| SCBI_0799 | Class V aminotransferase                     | -3.51  |
| SCBI_1882 | Peptidase T                                  | -2.04  |
| SCBI_3574 | Glycine/serine hydroxymethyltransferase      | -1.55  |

*Energy Production/Conversion*

|           |                                                |        |
|-----------|------------------------------------------------|--------|
|           | Nitrate reductase molybdenum cofactor assembly |        |
| SCBI_2681 | chaperone                                      | -14.68 |
| SCBI_3694 | Cytochrome C class I                           | -9.61  |
| SCBI_3196 | NAD-dependent aldehyde dehydrogenase           | -9.08  |

|           |                                        |       |
|-----------|----------------------------------------|-------|
| SCBI_4392 | NAD-dependent aldehyde dehydrogenase   | -3.34 |
| SCBI_3029 | Nitroreductase                         | -3.05 |
| SCBI_4339 | Phosphoenolpyruvate carboxykinase      | -2.27 |
| SCBI_0827 | Ubiquinone oxidoreductase subunit NqrD | -1.93 |
| SCBI_0823 | Ubiquinone oxidoreductase subunit NqrA | -1.83 |
| SCBI_3155 | NapC/NirT cytochrome c protein         | -1.82 |
| SCBI_0826 | Ubiquinone oxidoreductase subunit NqrC | -1.81 |

*No COG Assigned*

|           |                            |       |
|-----------|----------------------------|-------|
| SCBI_4188 | Phage shock protein G      | -8.14 |
| SCBI_1948 | Hypothetical               | -6.89 |
| SCBI_1257 | Hypothetical               | -6.85 |
| SCBI_4134 | Hypothetical               | -6.80 |
| SCBI_2897 | Hypothetical               | -5.56 |
| SCBI_4552 | Hypothetical               | -4.40 |
| SCBI_2644 | Hypothetical               | -3.81 |
| SCBI_1264 | Hypothetical               | -3.26 |
| SCBI_3749 | Hypothetical               | -3.26 |
| SCBI_1377 | Adenylate kinase           | -3.18 |
| SCBI_4308 | Hypothetical               | -2.03 |
| SCBI_1887 | Colicin-D immunity protein | -1.94 |
| SCBI_2635 | Hypothetical               | -1.52 |

---

**Table S5.** List of all genes significantly up-regulated  $\geq 1.5$ -fold (p-value  $< 0.05$ ) in mutant 22-C7 compared to wild-type *Serratia* sp. SCBI as determined with RNA-seq.

| <b>Locus Tag</b>                        | <b>Gene</b>                                                          | <b>Fold Change</b> |
|-----------------------------------------|----------------------------------------------------------------------|--------------------|
| <i>Defense Mechanisms</i>               |                                                                      |                    |
| SCBI_3535                               | ABC-type bacteriocin/lantibiotic exporter protein                    | 3.00               |
| <i>Signal Transduction</i>              |                                                                      |                    |
| SCBI_3135                               | DNA polymerase II subunit beta                                       | 4.52               |
| SCBI_2980                               | Response regulator with CheY domain, HTH DNA-binding domain          | 2.97               |
| SCBI_3212                               | Response regulator with CheY domain, HTH DNA-binding domain          | 1.79               |
| SCBI_0605                               | Response regulator with CheY domain, winged helix DNA-binding domain | 1.57               |
| SCBI_1671                               | Response regulator - LuxR family                                     | 4.30               |
| SCBI_3609                               | Anti-RNA polymerase sigma factor SigE                                | 2.00               |
| SCBI_3608                               | Anti-sigma E factor                                                  | 1.58               |
| SCBI_2382                               | Fumarate/nitrate reduction transcriptional regulator                 | 1.48               |
| <i>Function Unknown</i>                 |                                                                      |                    |
| SCBI_0448                               | Hypothetical                                                         | 3.22*              |
| SCBI_1197                               | Hypothetical                                                         | 10.58              |
| SCBI_1296                               | Hypothetical                                                         | 10.50              |
| SCBI_1189                               | Hypothetical                                                         | 6.87               |
| SCBI_2093                               | Hypothetical                                                         | 6.28               |
| SCBI_3391                               | Hypothetical                                                         | 5.01               |
| SCBI_2995                               | Hypothetical                                                         | 4.48               |
| SCBI_2999                               | Hypothetical                                                         | 3.47               |
| SCBI_0601                               | Inosine/xanthosine triphosphatase                                    | 3.24               |
| SCBI_2986                               | Hypothetical                                                         | 3.09               |
| SCBI_3637                               | Hypothetical                                                         | 2.77               |
| SCBI_2994                               | Type VI secretion protein                                            | 2.76               |
| SCBI_3834                               | Hypothetical                                                         | 2.38               |
| SCBI_4566                               | Hypothetical                                                         | 2.13               |
| SCBI_0182                               | Hypothetical                                                         | 2.12               |
| SCBI_1658                               | Hypothetical                                                         | 2.11               |
| SCBI_3835                               | Hypothetical                                                         | 1.52               |
| <i>General Function Prediction Only</i> |                                                                      |                    |
| SCBI_0907                               | Plasmid maintenance system antidote protein                          | 10.74              |

|           |                                                   |      |
|-----------|---------------------------------------------------|------|
| SCBI_0768 | Phage-related lysozyme                            | 9.87 |
| SCBI_1391 | Sulfite oxidase                                   | 7.79 |
| SCBI_1806 | Amidohydrolase                                    | 7.55 |
| SCBI_1310 | Plasmid stabilization protein                     | 6.31 |
|           | Metal-dependent hydrolase of beta-lactamase       |      |
| SCBI_0423 | superfamily                                       | 4.39 |
| SCBI_4365 | L-ascorbate 6-phosphate lactonase                 | 3.24 |
| SCBI_1919 | Gfa-like protein                                  | 2.92 |
| SCBI_4048 | Plasmid maintenance XRE family antidote protein   | 2.35 |
| SCBI_3255 | 5'-nucleotidase                                   | 2.03 |
| SCBI_1344 | 5'-nucleotidase                                   | 1.88 |
| SCBI_0339 | RNA-binding protein Hfq                           | 1.64 |
| SCBI_0403 | Lipoprotein NlpI                                  | 1.63 |
| SCBI_1156 | Acyl-CoA thioesterase YbgC                        | 1.60 |
| SCBI_1117 | Fe <sup>2+</sup> /Zn <sup>2+</sup> uptake protein | 1.51 |
| SCBI_0340 | GTPase                                            | 1.48 |

*Secondary Metabolite Biosynthesis/Transport/Catabolism*

|           |                           |      |
|-----------|---------------------------|------|
| SCBI_1177 | Isochorismatase hydrolase | 7.33 |
|-----------|---------------------------|------|

*Inorganic Ion Metabolism/Transport*

|           |                                                                    |       |
|-----------|--------------------------------------------------------------------|-------|
|           | ABC-type nitrate/sulfonate/bicarbonate transport system,           |       |
| SCBI_0500 | ATPase component                                                   | 4.76* |
| SCBI_0985 | ABC-type Mn/Zn transport system, ATPase component                  | 6.81  |
| SCBI_0959 | Ammonia permease                                                   | 6.47  |
| SCBI_0983 | Hha toxicity attenuator                                            | 1.91  |
| SCBI_0639 | CO <sub>2</sub> <sup>+</sup> /Mg <sup>2+</sup> efflux protein ApaG | 1.54  |

*Cell Motility*

|           |                                      |       |
|-----------|--------------------------------------|-------|
| SCBI_0301 | P pilus assembly protein, pilin FimA | 3.04* |
| SCBI_0297 | P pilus assembly protein, porin PapC | 3.67* |
| SCBI_0296 | P pilus assembly protein, pilin FimA | 8.98* |

*Cell Wall/Membrane/Envelope Biogenesis*

|           |                                                     |      |
|-----------|-----------------------------------------------------|------|
|           | Cell wall-associated hydrolase (invasion-associated |      |
| SCBI_2365 | protein)                                            | 3.80 |
| SCBI_0052 | Biotin carboxylase                                  | 2.33 |
| SCBI_0783 | Membrane-bound lytic murein transglycosylase D      | 2.31 |
| SCBI_3208 | OM protein C                                        | 2.15 |
| SCBI_2655 | Porin                                               | 2.10 |
| SCBI_4160 | Lipid A biosynthesis palmitoleoylacyltransferase    | 2.07 |
| SCBI_1161 | OM peptidoglycan-associated protein                 | 1.34 |
| SCBI_3312 | OM lipoprotein                                      | 3.19 |

*Replication/Repair/Recombination*

|           |                                                    |      |
|-----------|----------------------------------------------------|------|
| SCBI_0930 | Exonuclease VII small subunit                      | 3.77 |
| SCBI_4560 | Transposase for insertion element IS1669           | 2.01 |
| SCBI_4660 | Hypothetical                                       | 1.89 |
| SCBI_4239 | DNA topoisomerase type IA zn finger domain protein | 1.76 |

*Transcription*

|           |                                            |       |
|-----------|--------------------------------------------|-------|
| SCBI_0199 | Histone acetyltransferase HPA2             | 3.48* |
| SCBI_3442 | Histone acetyltransferase HPA2             | 2.39  |
| SCBI_0214 | LysR family transcriptional regulator      | 8.23* |
| SCBI_0963 | DNA-binding winged-HTH domain protein      | 14.30 |
| SCBI_1334 | Transcriptional regulator                  | 3.28  |
| SCBI_3139 | Transcriptional regulator                  | 3.25  |
| SCBI_2846 | LysR family transcriptional regulator      | 3.11  |
| SCBI_3467 | DNA-binding protein                        | 2.94  |
| SCBI_3610 | RNA polymerase sigma factor RpoE           | 1.90  |
| SCBI_0196 | RNA polymerase factor sigma-32             | 1.89  |
| SCBI_2463 | CysB transcriptional regulator             | 1.71  |
| SCBI_3253 | DNA-binding transcriptional repressor LrhA | 1.64  |

*Translation/Ribosomal Structure*

|           |                                           |      |
|-----------|-------------------------------------------|------|
| SCBI_1585 | Translation initiation factor 1           | 2.42 |
| SCBI_4102 | Ribosome hibernation promoting factor HPF | 1.92 |
| SCBI_3621 | Small protein A (tmRNA-binding protein)   | 1.92 |
| SCBI_0382 | Ribosomal protein L21                     | 1.89 |
| SCBI_0619 | Ribosomal protein S20                     | 1.66 |

*Coenzyme Metabolism/Transport*

|           |                                                         |       |
|-----------|---------------------------------------------------------|-------|
| SCBI_0025 | Phosphopantetheinyl transferase                         | 3.71* |
|           | Molybdopterin-guanine dinucleotide biosynthesis protein |       |
| SCBI_4583 | MobB                                                    | 3.50  |
|           | Adenosylmethionine-8-amino-7-oxononanoate               |       |
| SCBI_1190 | aminotransferase                                        | 3.10  |
| SCBI_4021 | 3,4-dihydroxy-2-butanone 4-phosphate synthase           | 2.99  |
| SCBI_4495 | Ribonuclease activity regulator protein RraA            | 1.83  |

*Carbohydrate Metabolism/Transport*

|           |                                  |       |
|-----------|----------------------------------|-------|
| SCBI_0116 | Sugar phosphate permease         | 2.66* |
| SCBI_4371 | Glycogen phosphorylase           | 2.31  |
| SCBI_4373 | ADP-glucose pyrophosphorylase    | 2.25  |
| SCBI_2457 | N-acetylglucosaminyl transferase | 1.87  |

*Amino Acid Metabolism/Transport*

|           |                                                                                         |       |
|-----------|-----------------------------------------------------------------------------------------|-------|
| SCBI_3279 | ABC-type amino acid transport/signal transduction systems, periplasmic component/domain | 2.02  |
| SCBI_0048 | Cys/Met metabolism pyridoxal-phosphate-dependent enzyme                                 | 7.68* |
| SCBI_0729 | ABC-type polar amino acid transport system, ATPase component                            | 12.11 |
| SCBI_2299 | Ethanolamine utilization protein                                                        | 5.16  |
| SCBI_2772 | Glycine cleavage system, regulatory protein                                             | 4.11  |
| SCBI_4484 | 5,10-methylenetetrahydrofolate reductase                                                | 2.29  |
| SCBI_2505 | ABC-type oligopeptide transport system, ATPase component                                | 1.99  |
| SCBI_0313 | Aspartate ammonia-lyase                                                                 | 1.69  |

*Cell Cycle Control and Mitosis*

|           |                                               |      |
|-----------|-----------------------------------------------|------|
| SCBI_2744 | Hypothetical                                  | 6.08 |
| SCBI_1311 | Antitoxin - prevent host-death family protein | 3.77 |

*Energy Production/Conversion*

|           |                                      |       |
|-----------|--------------------------------------|-------|
| SCBI_0493 | Alkanesulfonate monooxygenase        | 6.04* |
| SCBI_1951 | Citrate carrier protein              | 8.33  |
| SCBI_1662 | Acylphosphatase                      | 8.09  |
| SCBI_2222 | NAD-dependent aldehyde dehydrogenase | 2.65  |
| SCBI_2549 | Glycerol-3-phosphate dehydrogenase   | 1.79  |
| SCBI_3420 | Malic enzyme                         | 1.74  |

*No COG Assigned*

|           |                                                     |        |
|-----------|-----------------------------------------------------|--------|
| SCBI_0482 | Hypothetical                                        | 12.51* |
| SCBI_0435 | Hypothetical                                        | 14.52* |
| SCBI_2651 | Hypothetical                                        | 7.62   |
| SCBI_1547 | Phage late control gene                             | 6.51   |
| SCBI_1742 | Glyoxalase/bleomycin resistance protein/dioxygenase | 6.34   |
| SCBI_0365 | Hypothetical                                        | 5.82   |
| SCBI_2790 | Hypothetical                                        | 5.63   |
| SCBI_1821 | Hypothetical                                        | 5.57   |
| SCBI_2643 | Hypothetical                                        | 4.77   |
| SCBI_3488 | Hypothetical                                        | 4.48   |
| SCBI_2388 | Hypothetical                                        | 4.42   |
| SCBI_2014 | Hypothetical                                        | 4.36   |
| SCBI_1910 | Hypothetical                                        | 4.03   |
| SCBI_0124 | Cellulose biosynthesis protein BcsF/YhjT            | 3.79   |
| SCBI_3642 | Hypothetical                                        | 3.77   |
| SCBI_2084 | Hypothetical                                        | 3.69   |

|           |                                           |      |
|-----------|-------------------------------------------|------|
| SCBI_3338 | Hypothetical                              | 3.67 |
| SCBI_2979 | Hypothetical                              | 3.52 |
| SCBI_2637 | Hypothetical                              | 3.28 |
| SCBI_2286 | Hypothetical                              | 3.19 |
| SCBI_2252 | Hypothetical                              | 2.99 |
| SCBI_1545 | Phage terminase usbunit GpP               | 2.98 |
| SCBI_2746 | Head DNA stabilization protein            | 2.90 |
| SCBI_4647 | Hypothetical                              | 2.52 |
| SCBI_2390 | Hypothetical                              | 2.46 |
| SCBI_3237 | Hypothetical                              | 2.41 |
| SCBI_4351 | Hypothetical                              | 2.26 |
| SCBI_4608 | Hypothetical                              | 2.20 |
| SCBI_2743 | Head assembly protein                     | 1.91 |
| SCBI_1757 | Biofilm formation regulatory protein BssS | 1.90 |
| SCBI_4662 | Hypothetical                              | 1.88 |
| SCBI_4607 | Hypothetical                              | 1.85 |
| SCBI_0343 | Hypothetical                              | 1.82 |
| SCBI_4655 | Hypothetical                              | 1.81 |
| SCBI_4673 | Hypothetical                              | 1.79 |
| SCBI_2305 | IS3 family transposase orfA               | 1.78 |
| SCBI_4658 | Hypothetical                              | 1.59 |
| SCBI_3224 | IS3 family transposase orfA               | 1.58 |
| SCBI_1726 | Hypothetical                              | 1.58 |

---

\*Original value was infinity.



**Table S6.** List of all genes significantly down-regulated  $\geq -1.5$ -fold (p-value  $<0.05$ ) in mutant 22-C7 compared to wild-type *Serratia* sp. SCBI as determined with RNA-seq.

| <b>Locus Tag</b>                                              | <b>Gene</b>                                                 | <b>Fold Change</b> |
|---------------------------------------------------------------|-------------------------------------------------------------|--------------------|
| <i>Defense Mechanisms</i>                                     |                                                             |                    |
| SCBI_3918                                                     | ABC-type multidrug transport system, permease component     | -2.96              |
| <i>Intracellular Trafficking/Secretion</i>                    |                                                             |                    |
| SCBI_3604                                                     | Signal peptidase I                                          | -2.79              |
| <i>Signal Transduction</i>                                    |                                                             |                    |
| SCBI_4407                                                     | Response regulator with CheY domain, HTH DNA-binding domain | -2.88              |
| SCBI_1807                                                     | DnaK suppressor protein                                     | -3.83              |
| <i>Function Unknown</i>                                       |                                                             |                    |
| SCBI_3343                                                     | CsbD family protein                                         | -7.56              |
| SCBI_3413                                                     | Hypothetical                                                | -7.53              |
| SCBI_3295                                                     | Hypothetical                                                | -3.53              |
| SCBI_0075                                                     | 6-N-hydroxylaminopurine resistance protein                  | -3.44              |
| SCBI_3000                                                     | Hypothetical                                                | -2.74              |
| SCBI_2589                                                     | Hypothetical                                                | -2.19              |
| SCBI_3325                                                     | Hypothetical                                                | -1.63              |
| <i>General Function Prediction Only</i>                       |                                                             |                    |
| SCBI_0440                                                     | NADPH-quinone reductase (modulator of drug activity B)      | -19.16             |
| SCBI_3738                                                     | Cysteine desulfurase SufE                                   | -8.91              |
| SCBI_4167                                                     | Xanthine/uracil/vitamin C permease                          | -5.50              |
| SCBI_2606                                                     | Oxidoreductase                                              | -4.26              |
| SCBI_1789                                                     | Collagen-binding surface adhesin SpaP                       | -2.12              |
| SCBI_1262                                                     | Alpha/beta hydrolase superfamily protein                    | -2.09              |
| SCBI_1788                                                     | Periplasmic lipoprotein                                     | -1.88              |
| <i>Secondary Metabolite Biosynthesis/Transport/Catabolism</i> |                                                             |                    |
| SCBI_0289                                                     | Isochorismate hydrolase                                     | -6.87              |
| SCBI_1014                                                     | Thioesterase - involved in NRP biosynthesis                 | -2.60              |
| <i>Inorganic Ion Metabolism/Transport</i>                     |                                                             |                    |
| SCBI_4319                                                     | Nitrite reductase small subunit                             | -6.26              |
| SCBI_0789                                                     | Siderophore-interacting protein                             | -4.64              |

|                                               |                                                                               |        |
|-----------------------------------------------|-------------------------------------------------------------------------------|--------|
| SCBI_4214                                     | Sodium/hydrogen exchanger                                                     | -3.99  |
| SCBI_1103                                     | Alkylphosphonate utilization protein PhnA                                     | -3.68  |
| SCBI_0697                                     | Chloride channel protein EriC                                                 | -3.62  |
| SCBI_1278                                     | Sodium/solute symporter protein                                               | -3.32  |
| SCBI_0700                                     | ABC-type Fe <sup>3+</sup> hydroxamate transport system, periplasmic component | -3.32  |
| SCBI_0159                                     | Frataxin - iron transport protein                                             | -2.19  |
| <i>Chaperones</i>                             |                                                                               |        |
| SCBI_1589                                     | Thioredoxin reductase                                                         | -1.85  |
| <i>Cell Motility</i>                          |                                                                               |        |
| SCBI_4404                                     | P pilus assembly protein, pilin FimA                                          | -2.43  |
| SCBI_1526                                     | P pilus assembly protein, pilin FimA                                          | -4.50  |
| SCBI_2824                                     | FlgN family protein                                                           | -2.93  |
| SCBI_1518                                     | MrfE fimbrial protein                                                         | -7.23  |
| SCBI_2727                                     | Flagella biosynthesis protein FliZ                                            | -9.41  |
| <i>Cell Wall/Membrane/Envelope Biogenesis</i> |                                                                               |        |
| SCBI_1720                                     | OM lipoprotein NodT family                                                    | -3.50  |
| SCBI_0152                                     | Teichoic acid biosynthesis protein                                            | -2.95  |
| SCBI_0197                                     | Hypothetical                                                                  | -2.16  |
| SCBI_3469                                     | Cell envelope integrity inner membrane protein TolA                           | -1.73  |
| SCBI_1380                                     | OM protein X                                                                  | -1.61  |
| <i>Replication/Repair/Recombination</i>       |                                                                               |        |
| SCBI_1315                                     | NUDIX hydrolase (oxidative damage repair)                                     | -9.15  |
| SCBI_4070                                     | Hypothetical                                                                  | -3.09  |
| SCBI_2586                                     | Holliday junction DNA helicase RuvB                                           | -2.11  |
| <i>Transcription</i>                          |                                                                               |        |
| SCBI_3059                                     | Response regulator of citrate/malate metabolism                               | -3.50  |
| SCBI_1240                                     | Histone acetyltransferase HPA2                                                | -9.03  |
| SCBI_3633                                     | Histone acetyltransferase HPA2                                                | -3.60  |
| SCBI_0625                                     | LysR family transcriptional regulator                                         | -11.97 |
| SCBI_0515                                     | AraC family transcriptional regulator                                         | -7.20  |
| SCBI_1230                                     | AraC family transcriptional regulator                                         | -6.60  |
| SCBI_2058                                     | Transcriptional regulator                                                     | -3.87  |
| SCBI_1123                                     | PadR family transcriptional regulator                                         | -3.82  |
| SCBI_4227                                     | Transcriptional repressor IclR                                                | -3.15  |
| SCBI_3459                                     | Transcriptional regulator                                                     | -2.20  |
| SCBI_4089                                     | BolA family transcriptional regulator                                         | -1.78  |

*Translation/Ribosomal Structure*

|           |                                                |       |
|-----------|------------------------------------------------|-------|
| SCBI_1864 | Methylase of polypeptide chain release factors | -3.96 |
| SCBI_0989 | Ribosomal protein L31                          | -3.43 |
| SCBI_0399 | Ribosome-binding factor A                      | -2.26 |
| SCBI_4262 | Ribosomal protein S14                          | -2.12 |
| SCBI_4082 | 30S ribosomal protein S9                       | -2.10 |

*Lipid Metabolism/Transport*

|           |                                                       |        |
|-----------|-------------------------------------------------------|--------|
| SCBI_0513 | 3-Hydroxybutyrate dehydrogenase                       | -3.45  |
| SCBI_0524 | Phospholipase D                                       | -10.18 |
| SCBI_2459 | Membrane-associated phospholipidphosphatase           | -4.17  |
| SCBI_1860 | 4-diphosphocytidyl-2-C-methyl-D-erythritol kinase     | -2.23  |
| SCBI_0734 | 2-C-methyl-D-erythritol 2,4-cyclodiphosphate synthase | -2.16  |

*Coenzyme Metabolism/Transport*

|           |                                          |       |
|-----------|------------------------------------------|-------|
| SCBI_2136 | Dethiobiotin synthetase                  | -2.19 |
| SCBI_3915 | Panthothenate synthetase                 | -2.00 |
| SCBI_4524 | 2-amino-3-ketobutyrate coenzyme A ligase | -1.77 |

*Carbohydrate Metabolism/Transport*

|           |                                         |       |
|-----------|-----------------------------------------|-------|
| SCBI_0627 | Glycosyl transferase                    | -3.73 |
| SCBI_4055 | Glucuronate isomerase                   | -5.77 |
| SCBI_4520 | Phosphoglyceromutase                    | -4.82 |
| SCBI_1945 | Beta-fructosidase                       | -4.78 |
| SCBI_1173 | Galactose mutarotase                    | -3.76 |
| SCBI_2118 | Phosphotransferase system IIC component | -3.70 |
| SCBI_0394 | Phosphoglucosamine mutase               | -2.21 |
| SCBI_3852 | Ribose 5-phosphate isomerase            | -1.95 |
| SCBI_2038 | Phosphoenolpyruvate synthase            | -1.71 |
| SCBI_4213 | Glucose-6-phosphate isomerase           | -1.71 |
| SCBI_0709 | Enolase                                 | -1.67 |
| SCBI_0373 | Fructose-1,6-bisphosphatase             | -1.64 |

*Nucleotide Metabolism/Transport*

|           |                                                                                                   |       |
|-----------|---------------------------------------------------------------------------------------------------|-------|
| SCBI_0452 | Aspartate carbamoyltransferase, catalytic chain                                                   | -3.19 |
| SCBI_2619 | Phosphoribosylglycin amide formyltransferase 2<br>Phosphoribosylaminoimidazole succinocarboxamide | -3.14 |
| SCBI_3451 | (SAICAR) synthetase                                                                               | -3.05 |
| SCBI_0271 | AICAR transformylase/IMP cyclohydrolase PurH                                                      | -2.92 |
| SCBI_3473 | Phosphoribosylaminoimidazole (AIR) synthetase                                                     | -2.74 |
| SCBI_0362 | Phosphodiesterase                                                                                 | -2.45 |
| SCBI_0451 | Aspartate carbamoyltransferase                                                                    | -2.32 |
| SCBI_3590 | Phosphoribosylformyl glycinamidine synthase                                                       | -2.29 |

|           |                                   |       |
|-----------|-----------------------------------|-------|
| SCBI_4547 | Orotate phosphoribosyltransferase | -2.09 |
| SCBI_3281 | Amidophosphoribosyltransferase    | -1.87 |

*Amino Acid Metabolism/Transport*

|           |                                            |        |
|-----------|--------------------------------------------|--------|
| SCBI_0630 | Carbamoyl phosphate synthase large subunit | -2.01  |
| SCBI_0649 | Acetolactate synthase                      | -22.64 |
| SCBI_0800 | Allantoate amidohydrolase                  | -12.51 |
| SCBI_4595 | Asparagine synthetase AsnA                 | -5.94  |
| SCBI_3419 | Homocysteine methyltransferase             | -4.51  |
| SCBI_3574 | Serine hydroxymethyltransferase            | -1.83  |

*Energy Production/Conversion*

|           |                                         |        |
|-----------|-----------------------------------------|--------|
| SCBI_3196 | NAD-dependent aldehyde dehydrogenase    | -11.33 |
| SCBI_2103 | Electron transport complex protein RnfG | -10.98 |
| SCBI_2106 | Electron transport complex protein RnfC | -3.31  |
| SCBI_3029 | Nitroreductase                          | -2.91  |
| SCBI_2450 | Pyruvate-formate lyase                  | -2.19  |
| SCBI_4339 | Phosphoenolpyruvate carboxykinase (ATP) | -2.16  |
| SCBI_0006 | F0F1 ATP synthase subunit alpha         | -1.92  |
| SCBI_0005 | F0F1 ATP synthase subunit delta         | -1.90  |
| SCBI_0003 | F0F1 ATP synthase subunit K             | -1.84  |
| SCBI_1143 | Succinate dehydrogenase                 | -1.76  |

*No COG Assigned*

|           |                                      |        |
|-----------|--------------------------------------|--------|
| SCBI_4572 | Hypothetical                         | -18.28 |
| SCBI_3042 | Hypothetical                         | -10.20 |
| SCBI_3199 | Hypothetical                         | -4.42  |
| SCBI_4329 | Hypothetical                         | -4.23  |
| SCBI_1705 | Hypothetical                         | -3.54  |
| SCBI_1948 | Hypothetical                         | -3.10  |
| SCBI_3537 | Hypothetical                         | -2.86  |
| SCBI_1297 | Peptidase M60 viral enhancin protein | -2.72  |
| SCBI_1377 | Adenylate kinase                     | -2.64  |
| SCBI_1264 | Hypothetical                         | -2.57  |

---

**Table S7.** List of all the genes significantly up-regulated  $\geq 1.5$ -fold (p-value  $<0.05$ ) in mutant 22-F6 compared to wild-type *Serratia* sp. SCBI as determined with RNA-seq.

| <b>Locus Tag</b>                        | <b>Gene</b>                                                                   | <b>Fold Change</b> |
|-----------------------------------------|-------------------------------------------------------------------------------|--------------------|
| <i>Signal Transduction</i>              |                                                                               |                    |
| SCBI_3212                               | Response regulator with CheY receiver domain, HTH DNA-binding domain          | 1.66               |
| SCBI_0605                               | Response regulator with CheY receiver domain, winged-helix DNA-binding domain | 1.61               |
| SCBI_1839                               | Universal stress protein UspA                                                 | 3.56               |
| SCBI_0569                               | Diguanylate cyclase                                                           | 2.64               |
| SCBI_3609                               | Anti-RNA polymerase sigma factor SigE                                         | 1.90               |
| <i>Function Unknown</i>                 |                                                                               |                    |
| SCBI_1296                               | Hypothetical                                                                  | 13.80              |
| SCBI_1841                               | Hypothetical                                                                  | 6.48               |
| SCBI_0066                               | Hypothetical                                                                  | 5.71*              |
| SCBI_0482                               | Hypothetical                                                                  | 4.69*              |
| SCBI_2148                               | Hypothetical                                                                  | 4.63               |
| SCBI_2995                               | Hypothetical                                                                  | 3.83               |
| SCBI_2900                               | MgtC/SapB transporter                                                         | 3.15               |
| SCBI_3391                               | Hypothetical                                                                  | 3.03               |
| SCBI_3012                               | Hypothetical                                                                  | 2.76               |
| SCBI_4639                               | Hypothetical                                                                  | 2.31               |
| SCBI_3622                               | Hypothetical                                                                  | 2.24               |
| SCBI_3834                               | Hypothetical                                                                  | 2.08               |
| SCBI_1658                               | Hypothetical                                                                  | 1.87               |
| SCBI_3820                               | Hypothetical                                                                  | 1.72               |
| SCBI_2534                               | Hypothetical                                                                  | 1.65               |
| SCBI_0370                               | Hypothetical                                                                  | 1.61               |
| SCBI_4240                               | Hypothetical                                                                  | 1.60               |
| SCBI_4133                               | Hypothetical                                                                  | 2.82               |
| SCBI_2389                               | Hypothetical                                                                  | 2.18               |
| <i>General Function Prediction Only</i> |                                                                               |                    |
| SCBI_3570                               | Hypothetical                                                                  | 1.92               |
| SCBI_0185                               | Plasmid stabilization protein                                                 | 2.30               |
| SCBI_0044                               | Nucleic-acid binding protein, contains PIN domain                             | 1.98               |
| SCBI_0339                               | RNA-binding protein Hfq                                                       | 1.79               |
| SCBI_0293                               | Hypothetical                                                                  | 1.74               |

*Secondary Metabolite Biosynthesis/Transport/Catabolism*

|           |                                          |      |
|-----------|------------------------------------------|------|
| SCBI_1177 | Amidase                                  | 7.47 |
| SCBI_2923 | Phenylacetate-CoA oxygenase subunit PaaB | 6.20 |
| SCBI_1289 | Amidase                                  | 3.19 |

*Inorganic Ion Metabolism/Transport*

|           |                                                     |       |
|-----------|-----------------------------------------------------|-------|
| SCBI_3891 | Phenylpropionate dioxygenase                        | 2.77  |
| SCBI_0098 | Cyanate permease                                    | 2.76* |
| SCBI_3466 | Arsenate reductase                                  | 2.08  |
| SCBI_0983 | Hha toxicity attenuator                             | 2.01  |
| SCBI_4193 | Fe <sup>2+</sup> /Zn <sup>2+</sup> uptake regulator | 1.66  |

*Cell Motility*

|           |                                                              |      |
|-----------|--------------------------------------------------------------|------|
| SCBI_2959 | P pilus assembly protein, chaperone PapD                     | 6.92 |
| SCBI_0970 | Type II secretory pathway, pseudopilin PulG                  | 5.27 |
| SCBI_1666 | P pilus assembly protein, pilin FimA                         | 4.29 |
| SCBI_2962 | P pilus assembly protein, pilin FimA                         | 3.72 |
| SCBI_2956 | MrfF fimbrial protein                                        | 2.06 |
| SCBI_2958 | Fimbrial protein                                             | 3.27 |
| SCBI_1668 | P pilus assembly protein, porin PapC                         | 3.11 |
| SCBI_2961 | P pilus assembly protein, pilin FimA                         | 3.00 |
| SCBI_0978 | Type II secretory pathway, prepilin signal peptidase<br>PulO | 6.55 |

*Cell Wall/Membrane/Envelope Biogenesis*

|           |                                    |      |
|-----------|------------------------------------|------|
| SCBI_2368 | D-alanyl-Dalanine carboxypeptidase | 3.66 |
| SCBI_2655 | Outer membrane porin               | 2.91 |
| SCBI_3208 | Outer membrane porin               | 2.67 |
| SCBI_2581 | Lauroyl/myristoyl acyltransferase  | 1.94 |
| SCBI_2374 | Glycosyltransferase                | 1.91 |
| SCBI_0783 | Murein transglycosylase            | 1.84 |
| SCBI_1482 | UDP-glucose 4-epimerase            | 1.50 |

*Replication/Repair/Recombination*

|           |                                                         |       |
|-----------|---------------------------------------------------------|-------|
| SCBI_2623 | NUDIX hydrolase (oxidative damage repair enzyme)        | 4.18  |
| SCBI_1670 | DNA-damage-inducible protein J                          | 10.91 |
| SCBI_0962 | Methylated DNA-protein cysteine methyltransferase       | 9.14  |
| SCBI_0930 | Exonuclease VII small subunit                           | 4.41  |
| SCBI_4239 | DNA topoisomerase type IA zinc finger containing domain | 1.98  |
| SCBI_2745 | DNA stabilization protein GP10                          | 2.67  |

*Transcription*

|           |                                                            |       |
|-----------|------------------------------------------------------------|-------|
| SCBI_0199 | Histone acetyltransferase HPA2                             | 4.85* |
| SCBI_0517 | AraC family transcriptional regulator                      | 16.38 |
| SCBI_0963 | DNA-binding winged-HTH domain protein                      | 11.52 |
| SCBI_1929 | DNA-binding transcriptional repressor PuvR                 | 5.84  |
| SCBI_0045 | CopG family transcriptional regulator                      | 4.69  |
| SCBI_0495 | Transcriptional regulator                                  | 4.24* |
| SCBI_0214 | Transcriptional regulator                                  | 3.08* |
| SCBI_2138 | MerR family transcriptional regulator                      | 2.93  |
| SCBI_3139 | DNA-binding transcriptional repressor PuvR                 | 2.69  |
| SCBI_3467 | DNA binding protein                                        | 2.68  |
| SCBI_3253 | DNA-binding transcriptional repressor LrhA                 | 2.13  |
| SCBI_1012 | AraC family transcriptional regulator                      | 2.07  |
| SCBI_0196 | RNA polymerase factor sigma-32                             | 2.00  |
| SCBI_3610 | RNA polymerase sigma factor RpoE                           | 1.99  |
| SCBI_4641 | Hypothetical                                               | 1.86  |
| SCBI_2463 | Transcriptional regulator CysB                             | 1.81  |
| SCBI_2557 | Transcriptional regulator, fatty acid metabolism regulator | 1.60  |

*Translation/Ribosomal Structure*

|           |                                                    |       |
|-----------|----------------------------------------------------|-------|
| SCBI_0988 | Ribosomal protein L36                              | 15.10 |
| SCBI_2937 | Endoribonuclease L-PSP                             | 5.92  |
| SCBI_1685 | GNAT family acetyltransferase                      | 3.15  |
| SCBI_0338 | tRNA delta(2)-isopentenylpyrophosphate transferase | 1.98  |
| SCBI_3621 | Small protein A (tmRNA-binding protein)            | 1.77  |
| SCBI_4102 | Ribosome-associated protein Y                      | 1.72  |
| SCBI_0774 | Ribosome-associated protein Y                      | 1.71  |
| SCBI_0382 | Ribosomal protein L21                              | 1.55  |

*Lipid Metabolism/Transport*

|           |                                     |       |
|-----------|-------------------------------------|-------|
| SCBI_0508 | 3-oxoacid CoA-transferase subunit A | 33.55 |
| SCBI_2938 | Esterase/lipase                     | 2.48  |

*Coenzyme Metabolism/Transport*

|           |                                              |       |
|-----------|----------------------------------------------|-------|
| SCBI_0025 | Phosphopantetheinyl transferase              | 3.72* |
| SCBI_4495 | Ribonuclease activity regulator protein RraA | 1.86  |

*Carbohydrate Metabolism/Transport*

|           |                                                              |      |
|-----------|--------------------------------------------------------------|------|
| SCBI_2500 | Permease                                                     | 3.78 |
| SCBI_2057 | Permease                                                     | 2.27 |
| SCBI_3267 | Phosphotransferase system, galactitol-specific IIB component | 3.98 |
| SCBI_1217 | Sugar phosphate permease                                     | 3.62 |
| SCBI_0117 | Chitinase                                                    | 3.11 |

|           |                                                                  |       |
|-----------|------------------------------------------------------------------|-------|
| SCBI_3153 | Mannitol/fructose-specific phosphotransferase system, IIA domain | 2.83  |
| SCBI_4313 | Phosphotransferase system cellobiose-specific component IIA      | 2.78  |
| SCBI_2533 | Chitinase                                                        | 2.63  |
| SCBI_4371 | Glucan phosphorylase                                             | 2.61  |
| SCBI_0483 | Beta-glucosidase                                                 | 2.40* |
| SCBI_4373 | Glucose-1-phosphate adenylyltransferase                          | 2.19  |
| SCBI_4497 | MIP family channel protein                                       | 2.16  |
| SCBI_1111 | Glucosamine-6-phosphate deaminase                                | 2.07  |
| SCBI_2457 | N-acetylglucosaminyl transferase                                 | 2.05  |
| SCBI_2942 | Glycogen synthesis protein                                       | 2.14  |

*Nucleotide Metabolism/Transport*

|           |                          |      |
|-----------|--------------------------|------|
| SCBI_2155 | dGTP triphosphohydrolase | 1.93 |
|-----------|--------------------------|------|

*Amino Acid Metabolism/Transport*

|           |                                                                                         |       |
|-----------|-----------------------------------------------------------------------------------------|-------|
| SCBI_2224 | ABC-type amino acid transport, substratebinding protein                                 | 4.68  |
| SCBI_3279 | ABC-type amino acid transport/signal transduction systems, periplasmic component/domain | 2.44  |
| SCBI_0120 | ABC-type dipeptide/oligopeptide/nickel transport, permease                              | 3.87  |
| SCBI_0801 | Threonine efflux protein                                                                | 10.42 |
| SCBI_1506 | Agmatinase                                                                              | 6.02  |
| SCBI_2641 | Glutathione transferase                                                                 | 4.05  |
| SCBI_3207 | Lactoylglutathione lyase                                                                | 3.58  |
| SCBI_3276 | ABC-type arginine/histidine transporter system, permease                                | 3.09  |
| SCBI_3888 | Lactoylglutathione lyase                                                                | 3.07  |
| SCBI_2505 | ABC-type oligopeptide transport system, ATPase component                                | 2.03  |
| SCBI_0313 | Aspartate ammonia lyase                                                                 | 2.00  |
| SCBI_1743 | Permease                                                                                | 1.67  |

*Cell Cycle Control and Mitosis*

|           |                                      |      |
|-----------|--------------------------------------|------|
| SCBI_2744 | Chromosome segregation ATPases       | 3.55 |
| SCBI_4146 | MreB - rod-shape-determining protein | 1.58 |

*Energy Production/Conversion*

|           |                                            |       |
|-----------|--------------------------------------------|-------|
| SCBI_0527 | NAD-dependent aldehyde dehydrogenase       | 14.26 |
| SCBI_1951 | Citrate carrier protein                    | 9.07  |
| SCBI_0981 | Cytochrome B561                            | 7.61  |
| SCBI_1392 | Thiosulfate reductase cytochrome B subunit | 5.68  |



|           |                                                                                         |      |
|-----------|-----------------------------------------------------------------------------------------|------|
| SCBI_1662 | Acylphosphatase                                                                         | 5.33 |
| SCBI_2222 | Aldehyde dehydrogenase                                                                  | 3.14 |
| SCBI_3352 | Cytochrome B561                                                                         | 2.65 |
| SCBI_3275 | ABC-type histidine transport system, ATPase component                                   | 2.45 |
| SCBI_3279 | ABC-type amino acid transport/signal transduction systems, periplasmic component/domain | 2.39 |
| SCBI_1114 | Porin                                                                                   | 2.36 |
| SCBI_0559 | Ureidoglycolate lyase                                                                   | 2.25 |

*No COG Assigned*

|           |                                                     |       |
|-----------|-----------------------------------------------------|-------|
| SCBI_1547 | Phage late control gene                             | 13.04 |
| SCBI_1251 | Hypothetical                                        | 10.83 |
| SCBI_1742 | Glyoxalase/bleomycin resistance protein/dioxygenase | 8.12  |
| SCBI_1754 | Hypothetical                                        | 8.09  |
| SCBI_2651 | Hypothetical                                        | 6.52  |
| SCBI_2004 | Hypothetical                                        | 6.35  |
| SCBI_0365 | Hypothetical                                        | 6.14  |
| SCBI_2963 | Hypothetical                                        | 5.69  |
| SCBI_2388 | Hypothetical                                        | 5.35  |
| SCBI_2637 | Hypothetical                                        | 5.25  |
| SCBI_2790 | Hypothetical                                        | 5.23  |
| SCBI_0306 | Hypothetical                                        | 4.87* |
| SCBI_2957 | MrfE pilus protein                                  | 4.74  |
| SCBI_2782 | Hypothetical                                        | 4.54  |
| SCBI_2747 | Phage protein                                       | 3.98  |
| SCBI_2371 | Hypothetical                                        | 3.85  |
| SCBI_3338 | Hypothetical                                        | 3.78  |
| SCBI_2286 | Hypothetical                                        | 3.62  |
| SCBI_2965 | Putative secretion protein                          | 3.14  |
| SCBI_2954 | Hypothetical                                        | 2.92  |
| SCBI_4647 | Hypothetical                                        | 2.66  |
| SCBI_0472 | Transposase IS3/IS911 family protein                | 2.16  |
| SCBI_1757 | Biofilm regulatory protein BssS                     | 2.07  |
| SCBI_4607 | Hypothetical                                        | 2.02  |
| SCBI_4673 | Hypothetical                                        | 1.80  |
| SCBI_4655 | Hypothetical                                        | 1.74  |
| SCBI_4662 | Hypothetical                                        | 1.67  |
| SCBI_0184 | Putative stability determinant                      | 1.66  |
| SCBI_4661 | Hypothetical                                        | 1.64  |
| SCBI_3692 | Hypothetical                                        | 1.61  |
| SCBI_4658 | Hypothetical                                        | 1.60  |
| SCBI_1544 | Hypothetical                                        | 1.59  |

\*Original value was infinity.

**Table S8.** List of all the genes significantly down-regulated  $\geq -1.5$ -fold (p-value  $<0.05$ ) in mutant 22-F6 compared to wild-type *Serratia* sp. SCBI as determined with RNA-seq.

| <b>Locus Tag</b>                           | <b>Gene</b>                                                     | <b>Fold Change</b> |
|--------------------------------------------|-----------------------------------------------------------------|--------------------|
| <i>Defense Mechanisms</i>                  |                                                                 |                    |
| SCBI_1721                                  | ABC-type antimicrobial peptide transport, ATPase                | -3.09              |
| <i>Intracellular Trafficking/Secretion</i> |                                                                 |                    |
| SCBI_4059                                  | SecD - EnvZ/OmpR regulon moderator                              | -2.81              |
| <i>Signal Transduction</i>                 |                                                                 |                    |
| SCBI_0114                                  | Response regulator with CheY domain                             | -5.76*             |
| SCBI_2700                                  | Response regulator with CheY domain                             | -4.49              |
| <i>Function Unknown</i>                    |                                                                 |                    |
| SCBI_4435                                  | Hypothetical                                                    | -6.69              |
| SCBI_3343                                  | Hypothetical                                                    | -5.94              |
| SCBI_0699                                  | Hypothetical                                                    | -5.83              |
| SCBI_3387                                  | Hypothetical                                                    | -3.87              |
| SCBI_2860                                  | Hypothetical                                                    | -3.43              |
| SCBI_4456                                  | Hypothetical                                                    | -3.12              |
| SCBI_3687                                  | Hypothetical                                                    | -2.47              |
| SCBI_3000                                  | Hypothetical                                                    | -2.07              |
| SCBI_4325                                  | Hypothetical                                                    | -1.70              |
| <i>General Function Prediction Only</i>    |                                                                 |                    |
| SCBI_0440                                  | Putative NADPH-quinone reductase (modulator of drug activity B) | -11.39*            |
| SCBI_1229                                  | Intracellular protease/amidase                                  | -18.30             |
| SCBI_2218                                  | Hypothetical                                                    | -8.30              |
| SCBI_0434                                  | Permease                                                        | -4.46              |
| SCBI_3840                                  | Acetyltransferase                                               | -4.11              |
| SCBI_3045                                  | Permease                                                        | -3.83              |
| SCBI_0270                                  | Phosphoribosylamine-glycine ligase                              | -2.69              |
| <i>Inorganic Ion Metabolism/Transport</i>  |                                                                 |                    |
| SCBI_4319                                  | Nitrite reductase small subunit                                 | -2.79              |
| SCBI_0444                                  | Cation transport ATPase                                         | -8.22*             |
| SCBI_0159                                  | Fratxin - iron transport protein                                | -3.37              |
| <i>Chaperones</i>                          |                                                                 |                    |

|           |                                          |       |
|-----------|------------------------------------------|-------|
| SCBI_2449 | Pyruvate-formate lyase-activating enzyme | -2.70 |
| SCBI_4493 | ATP-dependent protease                   | -2.61 |
| SCBI_0316 | Chaperonin GroEL                         | -1.82 |

*Cell Motility*

|           |                                          |       |
|-----------|------------------------------------------|-------|
| SCBI_4403 | P pilus assembly protein, chaperone PapD | -7.45 |
| SCBI_2972 | P pilus assembly protein, chaperone PapD | -3.40 |
| SCBI_4402 | P pilus assembly protein, porin PapC     | -2.99 |
| SCBI_1518 | MrfE fimbrial protein                    | -3.42 |
| SCBI_2727 | Flagella biosynthesis protein FliZ       | -5.17 |
| SCBI_4404 | P pilus assembly protein, pilin FimA     | -2.26 |

*Cell Wall/Membrane/Envelope Biogenesis*

|           |                                                         |       |
|-----------|---------------------------------------------------------|-------|
| SCBI_1720 | Outer membrane protein                                  | -4.31 |
| SCBI_2689 | Glycosyl transferase family protein                     | -7.45 |
| SCBI_2191 | Cell division protein FtsI/penicillin-binding protein 2 | -3.91 |
| SCBI_3022 | Phosphoglycerol transferase                             | -3.49 |
| SCBI_4599 | 16S rRNA methyltransferase GidB                         | -2.71 |
| SCBI_1473 | Mannose-1-phosphate guanylyltransferase                 | -1.90 |
| SCBI_3469 | Cell envelope integrity inner membrane protein TolA     | -1.52 |

*Replication/Repair/Recombination*

|           |                                                  |        |
|-----------|--------------------------------------------------|--------|
| SCBI_1315 | NUDIX hydrolase (oxidative damage repair enzyme) | -15.45 |
| SCBI_1258 | Hypothetical                                     | -4.46  |
| SCBI_2115 | NUDIX hydrolase (oxidative damage repair enzyme) | -3.72  |
| SCBI_0460 | DNA polymerase III, chi subunit                  | -7.36  |
| SCBI_3746 | Prepilin peptidase dependent protein c           | -2.91  |
| SCBI_0467 | Transposase IS3/IS911 family                     | -2.25  |

*Transcription*

|           |                                            |       |
|-----------|--------------------------------------------|-------|
| SCBI_2150 | Histone acetyltransferase HPA2             | -3.38 |
| SCBI_3633 | Histone acetyltransferase HPA2             | -3.02 |
| SCBI_1277 | Histone acetyltransferase HPA2             | -2.61 |
| SCBI_0593 | LysR family transcriptional regulator      | -7.61 |
| SCBI_3185 | Transcriptional regulator                  | -5.94 |
| SCBI_2939 | LysR family transcriptional regulator      | -5.29 |
| SCBI_3668 | LysR family transcriptional regulator      | -4.93 |
| SCBI_1351 | AsnC family transcriptional regulator      | -3.85 |
| SCBI_4089 | BolA family transcriptional regulator      | -1.97 |
| SCBI_0924 | Transcription antitermination protein NusB | -1.83 |

*Translation/Ribosomal Structure*

|           |                       |        |
|-----------|-----------------------|--------|
| SCBI_0989 | Ribosomal protein L31 | -28.94 |
|-----------|-----------------------|--------|

|           |                                               |       |
|-----------|-----------------------------------------------|-------|
| SCBI_0399 | Ribosome-binding factor A                     | -2.66 |
| SCBI_0735 | tRNA pseudouridine synthase D                 | -2.35 |
| SCBI_2020 | Methionyl-tRNA formyltransferase              | -1.81 |
| SCBI_4082 | Ribosomal protein S9                          | -1.70 |
| SCBI_0450 | Translation initiation inhibitor, yjgF family | -1.64 |
| SCBI_1766 | Ribosomal protein L32                         | -1.64 |

*Coenzyme Metabolism/Transport*

|           |                                |       |
|-----------|--------------------------------|-------|
| SCBI_3289 | Phosphoglycerate dehydrogenase | -2.35 |
| SCBI_0393 | Dihydropteroate synthase       | -2.12 |

*Carbohydrate Metabolism/Transport*

|           |                                               |       |
|-----------|-----------------------------------------------|-------|
| SCBI_1013 | Permease - Bcr/CflA subfamily drug resistance | -2.44 |
| SCBI_1173 | Galactose mutarotase                          | -4.77 |
| SCBI_4520 | Phosphoglyceromutase                          | -4.10 |
| SCBI_0709 | Enolase                                       | -1.98 |
| SCBI_0820 | Phosphoheptose isomerase                      | -1.84 |
| SCBI_2038 | Phosphoenolpyruvate synthase                  | -1.80 |
| SCBI_3852 | Ribose 5-phosphate isomerase                  | -1.67 |
| SCBI_3878 | Transketolase                                 | -1.67 |

*Nucleotide Metabolism/Transport*

|           |                                                                     |        |
|-----------|---------------------------------------------------------------------|--------|
| SCBI_0094 | Cytosine deaminase                                                  | -8.53  |
| SCBI_1035 | Phosphoribosylcarboxyaminoimidazole (NCAIR) mutase                  | -17.30 |
| SCBI_1034 | Phosphoribosylcarboxyaminoimidazole (NCAIR) synthetase              | -6.17  |
| SCBI_2619 | Phosphoribosylglycin amide formyltransferase 2                      | -3.61  |
| SCBI_3473 | Phosphoribosylaminoimidazole (AIR) synthetase                       | -3.40  |
| SCBI_0271 | AICAR transformylase                                                | -3.00  |
| SCBI_3471 | Uracil permease                                                     | -2.76  |
| SCBI_0452 | Aspartate carbamoyltransferase                                      | -2.55  |
| SCBI_4547 | Orotate phosphoribosyltransferase                                   | -2.39  |
| SCBI_0362 | 2',3'-cyclic-nucleotide 2'-phosphodiesterase                        | -2.31  |
| SCBI_3540 | GMP synthase                                                        | -2.21  |
| SCBI_3590 | Phosphoribosylformyl glycinamide synthase                           | -2.20  |
| SCBI_3451 | Phosphoribosylaminoimidazole succinocarboxamide (SAICAR) synthetase | -1.90  |
| SCBI_3474 | Phosphoribosylglycin amide formyltransferase                        | -1.78  |
| SCBI_3281 | Amidophosphoribosyl transferase                                     | -1.83  |

*Amino Acid Metabolism/Transport*

|           |                                           |       |
|-----------|-------------------------------------------|-------|
| SCBI_0630 | Carbamoylphosphate synthase large subunit | -2.63 |
| SCBI_0629 | Carbamoylphosphate synthase small subunit | -1.80 |

|           |                                            |        |
|-----------|--------------------------------------------|--------|
| SCBI_0178 | Anaerobic glycerol-3-phosphatedhydrogenase | -11.43 |
| SCBI_2212 | Spermidine synthase                        | -5.26  |
| SCBI_0649 | Acetolactase synthase regulatory subunit   | -3.95  |
| SCBI_3764 | Diaminopimelate decarboxylase              | -3.64  |
| SCBI_3843 | Glycine cleavage system H protein          | -1.99  |
| SCBI_3574 | Glycine/serine hydroxymethyltransferase    | -1.55  |

*Energy Production/Conversion*

|           |                                       |       |
|-----------|---------------------------------------|-------|
| SCBI_2165 | Isoquinoline 1-oxidoreductase         | -9.92 |
| SCBI_3196 | NAD-dependent aldehyde dehydrogenases | -7.34 |
| SCBI_0847 | Cytochrome B561                       | -5.14 |
| SCBI_0104 | NADH:flavin oxidoreductase            | -5.10 |
| SCBI_0003 | F0F1-type ATP synthase subunit C      | -2.05 |
| SCBI_4339 | Phosphoenolpyruvate carboxykinase     | -1.97 |
| SCBI_0005 | F0F1-type ATP synthase subunit delta  | -1.72 |

*RNA Processing/Modification*

|           |                   |       |
|-----------|-------------------|-------|
| SCBI_0332 | Oligoribonuclease | -2.24 |
|-----------|-------------------|-------|

*No COG Assigned*

|           |                                      |       |
|-----------|--------------------------------------|-------|
| SCBI_1948 | Hypothetical                         | -8.15 |
| SCBI_4572 | Hypothetical                         | -7.92 |
| SCBI_4188 | Phage shock protein G                | -7.74 |
| SCBI_2437 | Hypothetical                         | -7.71 |
| SCBI_2867 | Hypothetical                         | -7.01 |
| SCBI_3537 | Hypothetical                         | -6.78 |
| SCBI_4629 | Hypothetical                         | -6.62 |
| SCBI_3794 | Hypothetical                         | -4.15 |
| SCBI_1297 | Peptidase M60 viral enhancin protein | -4.04 |
| SCBI_2866 | Hypothetical                         | -4.01 |
| SCBI_2897 | Hypothetical                         | -3.93 |
| SCBI_1377 | Adenylate kinase                     | -3.45 |
| SCBI_4631 | Hypothetical                         | -3.34 |
| SCBI_1914 | Hypothetical                         | -3.09 |
| SCBI_1264 | Hypothetical                         | -2.08 |

---

\*Original value was infinity.

**Table S9.** Results of qRT-PCR validation of the expression of 4 randomly selected genes from the protease mutants (16-D2, 22-C7, and 22-F6) as compared to wild-type *Serratia* sp. SCBI.

| <b>Sample</b> | <b>Gene</b>                             | <b>Locus Tag</b> | <b>Fold Change</b> |                |
|---------------|-----------------------------------------|------------------|--------------------|----------------|
|               |                                         |                  | <b>RNA-Seq</b>     | <b>qRT-PCR</b> |
| 16-D2         | Hemolysin co-regulated protein ImpD     | SCBI_2996        | 10.37              | 8.24           |
| 16-D2         | Heme exporter protein CcmC              | SCBI_3334        | -4.68              | -5.19          |
| 22-C7         | Glyoxylase/bleomycin resistance protein | SCBI_1742        | 6.34               | 6.91           |
| 22-C7         | Flagella protein FliZ                   | SCBI_2727        | -9.41              | -7.33          |
| 22-F6         | Glyoxylase/bleomycin resistance protein | SCBI_1742        | 8.12               | 5.78           |
| 22-F6         | Flagella protein FliZ                   | SCBI_2727        | -5.17              | -3.64          |

**A** *Serratia* sp. SCBI

| Mutant | Gene Hit                                                    | Gene Function                       |
|--------|-------------------------------------------------------------|-------------------------------------|
| 16-D2  | <i>aprE</i>                                                 | Alkaline protease secretion protein |
| 22-A7  | BglB family transcriptional antiterminator                  | Transcriptional regulation          |
| 22-B9  | Inosine/xanthosine triphosphatase                           | Involved in oxidative damage        |
| 22-C7  | <i>gidA</i>                                                 | tRNA modification enzyme            |
| 22-D7  | Methyl-accepting chemotaxis protein                         | Transmembrane sensor protein        |
| 22-F6  | Predicted nucleic acid-binding protein, contains PIN domain | Cleavage of single-stranded RNA     |

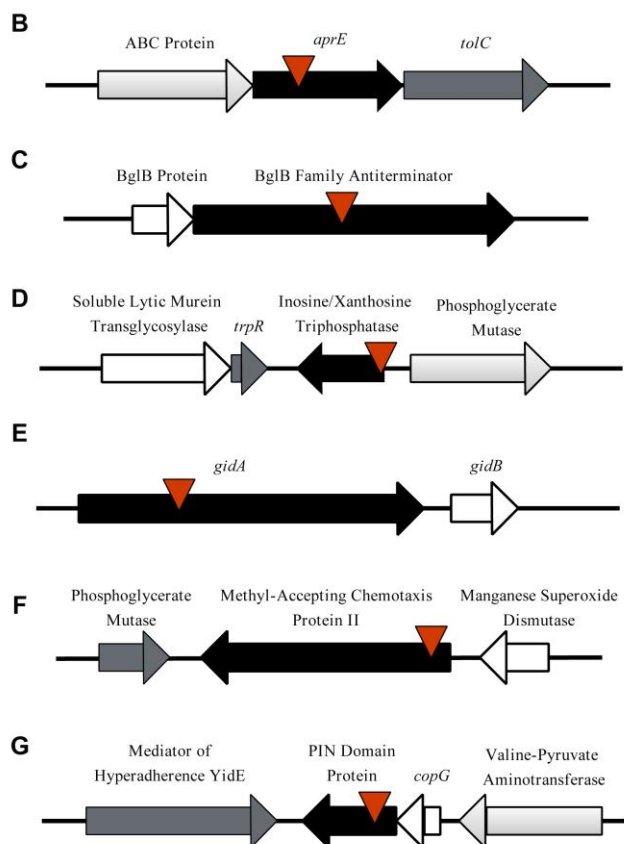

**Figure S1.** Identification of genes inactivated by miniHimar RB1 transposon insertion in the 6 protease mutants. **(A)** The site of transposon insertion was identified using rescue cloning and the genes and their predicted functions are listed. **(B-G)** Diagrams of the miniHimar RB1 transposon insertion site in each of the protease mutants, with the upside-down arrow representing the transposon insertion. **(B)** Mutant 16-D2 had the *aprE* gene inactivated, which lies in the middle of a 3 gene operon coding for a predicted ABC transporter. **(C)** Mutant 22-A7 had a BglB family antiterminator gene hit by the transposon. This gene is the second gene in an operon, in which the first gene is also a BglB family antiterminator. **(D)** Mutant 22-B9 had an inosine/xanthosine triphosphatase gene hit 12 bp downstream of the start codon. **(E)** Mutant 22-C7 had the transposon insertion in *gidA*. **(F)** Mutant 22-D7 had a predicted methyl-accepting chemotaxis protein II inactivated. **(G)** Mutant 22-F6 had the insertion in a predicted nucleic acid-binding protein, which is the second gene in an operon that also contains a predicted CopG family DNA-binding protein.
